# Supplementary material
Source: HighWire-hosted journal article supplement (https://jnm.snmjournals.org/highwire/filestream/95243/field_highwire_adjunct_files/0/197665_Supplemental_Data.pdf)
Supplement: 197665_Supplemental_Data.pdf [file 197665_Supplemental_Data.pdf]

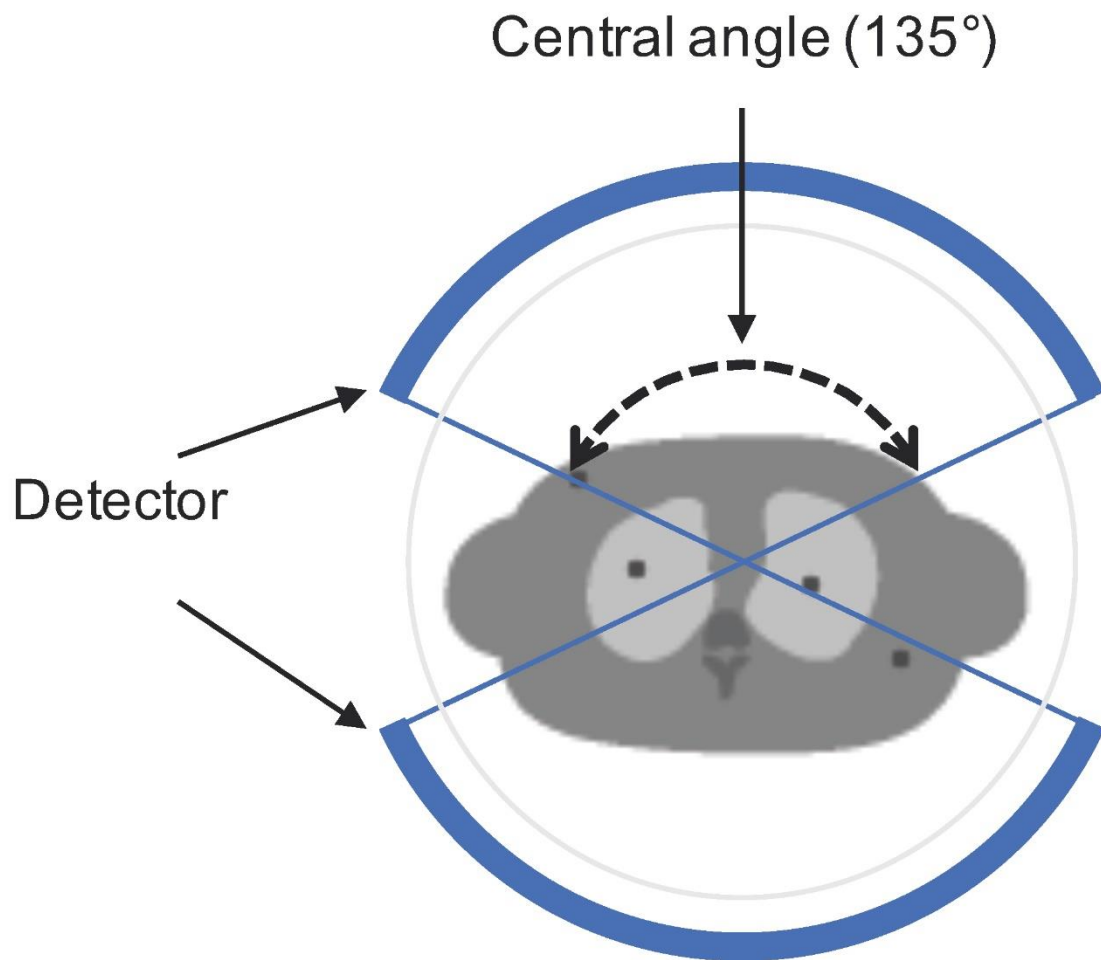

1

2 Supplemental Figure 1.

3 The central angle of the detector arc. The detector pair covered 270 degrees out of 360 degrees.
